# Supplementary material
Source: MDPI journal article supplement (https://www.mdpi.com/2673-3293/3/3/35)
Supplement: s1 [file s1]

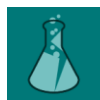

## Supporting Information

Three-Dimensional Hybrid Nanostructures of Fe<sub>3</sub>O<sub>4</sub> Nanoparticles/Vertically-Aligned Carbon Nanotube Arrays for Supercapacitor Application

Bin Zhao \*

School of Materials & Chemistry, University of Shanghai for Science and Technology, Shanghai 200093, China;  
zhaobin@usst.edu.cn

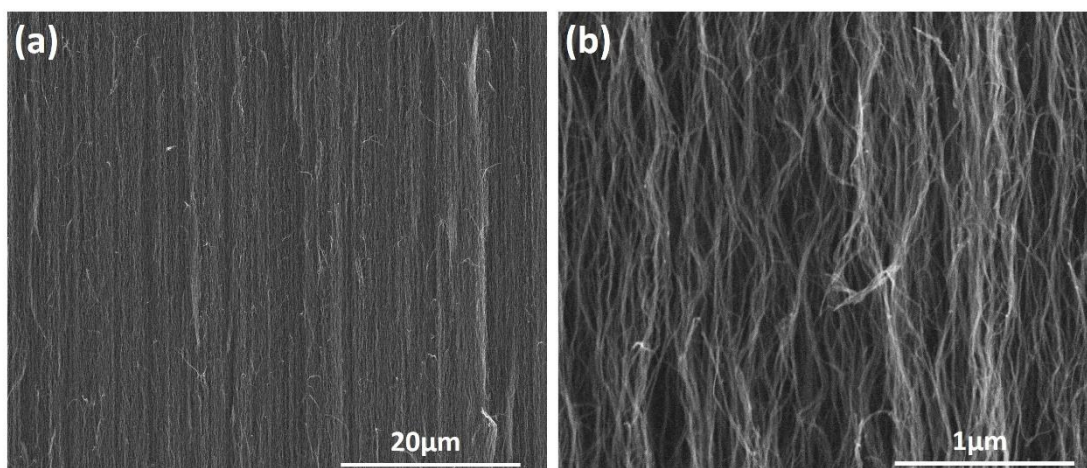

Figure S1. FESEM images of cross sections of pure VACNTs at different magnifications.

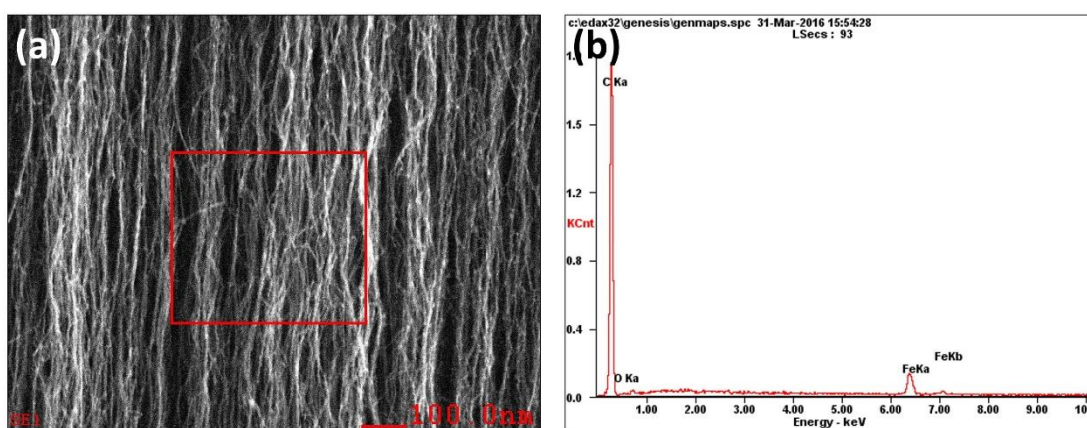

Figure S2. EDS spectrum of the Fe<sub>3</sub>O<sub>4</sub>/VACNTs-550 sample.

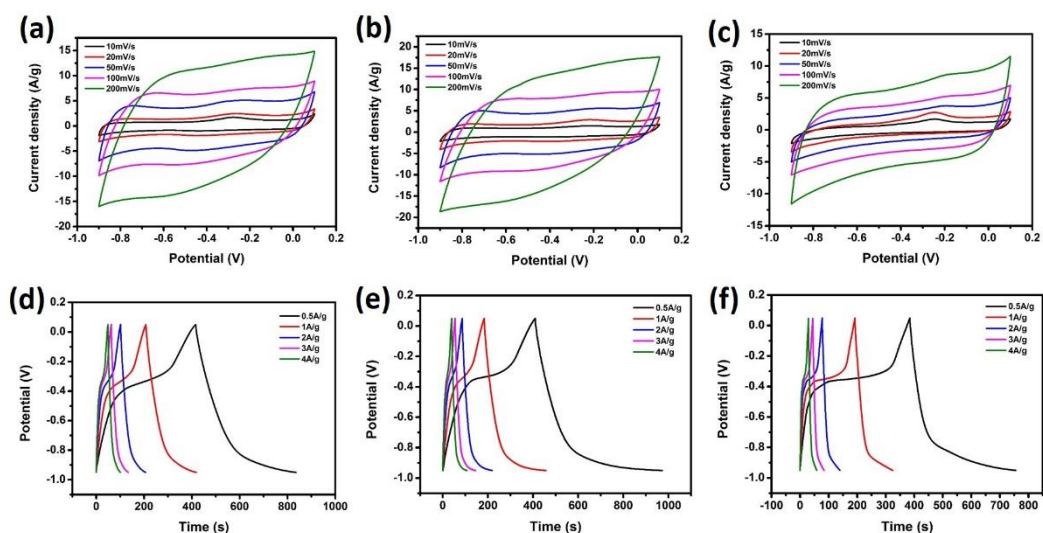

**Figure S3.** CVs and GCD curves of the  $\text{Fe}_3\text{O}_4/\text{VACNTs}$  hybrids annealed at different temperature: (a, d)  $\text{Fe}_3\text{O}_4/\text{VACNTs}$ -500; (b, e)  $\text{Fe}_3\text{O}_4/\text{VACNTs}$ -500; (c, f)  $\text{Fe}_3\text{O}_4/\text{VACNTs}$ -600.

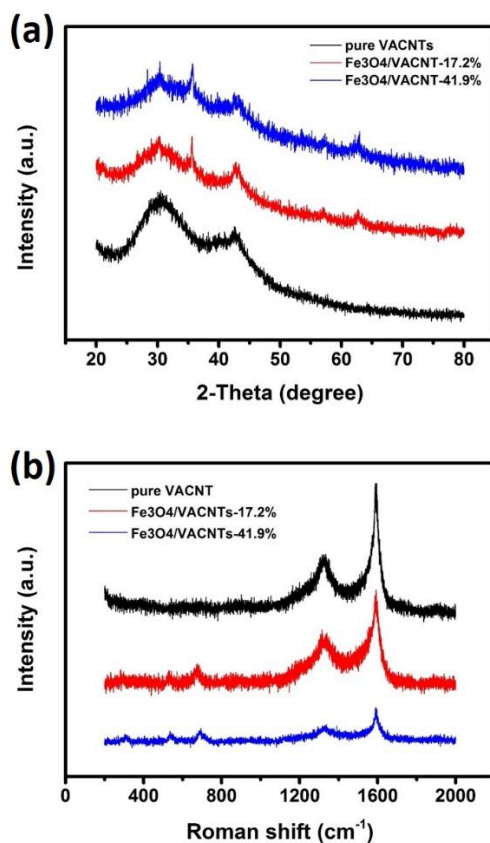

**Figure S4.** XRD patterns a) and Raman spectra b) of the pure VACNTs and  $\text{Fe}_3\text{O}_4/\text{VACNTs}$  composites with different loading mass percentage.
